# Supplementary material for: Preparation, Characterization, and Biological Evaluation of Poly(Glutamic Acid)-b-Polyphenylalanine Polymersomes
Source: Polymers (Basel). 2016 Jun 2;8(6):212. doi: 10.3390/polym8060212 (PMC6432269; doi:10.3390/polym8060212)
Supplement: Supplementary file 1 [file polymers-08-00212-s001.pdf]

# Supplementary Materials: Preparation, Characterization and Biological Evaluation of Poly(Glutamic Acid)-*b*- Polyphenylalanine Polymersomes

Evgenia Vlakh, Anastasiia Ananyan, Natalia Zashikhina, Anastasiia Hubina,  
Aleksander Pogodaev, Mariia Volokitina, Vladimir Sharoyko and Tatiana Tennikova

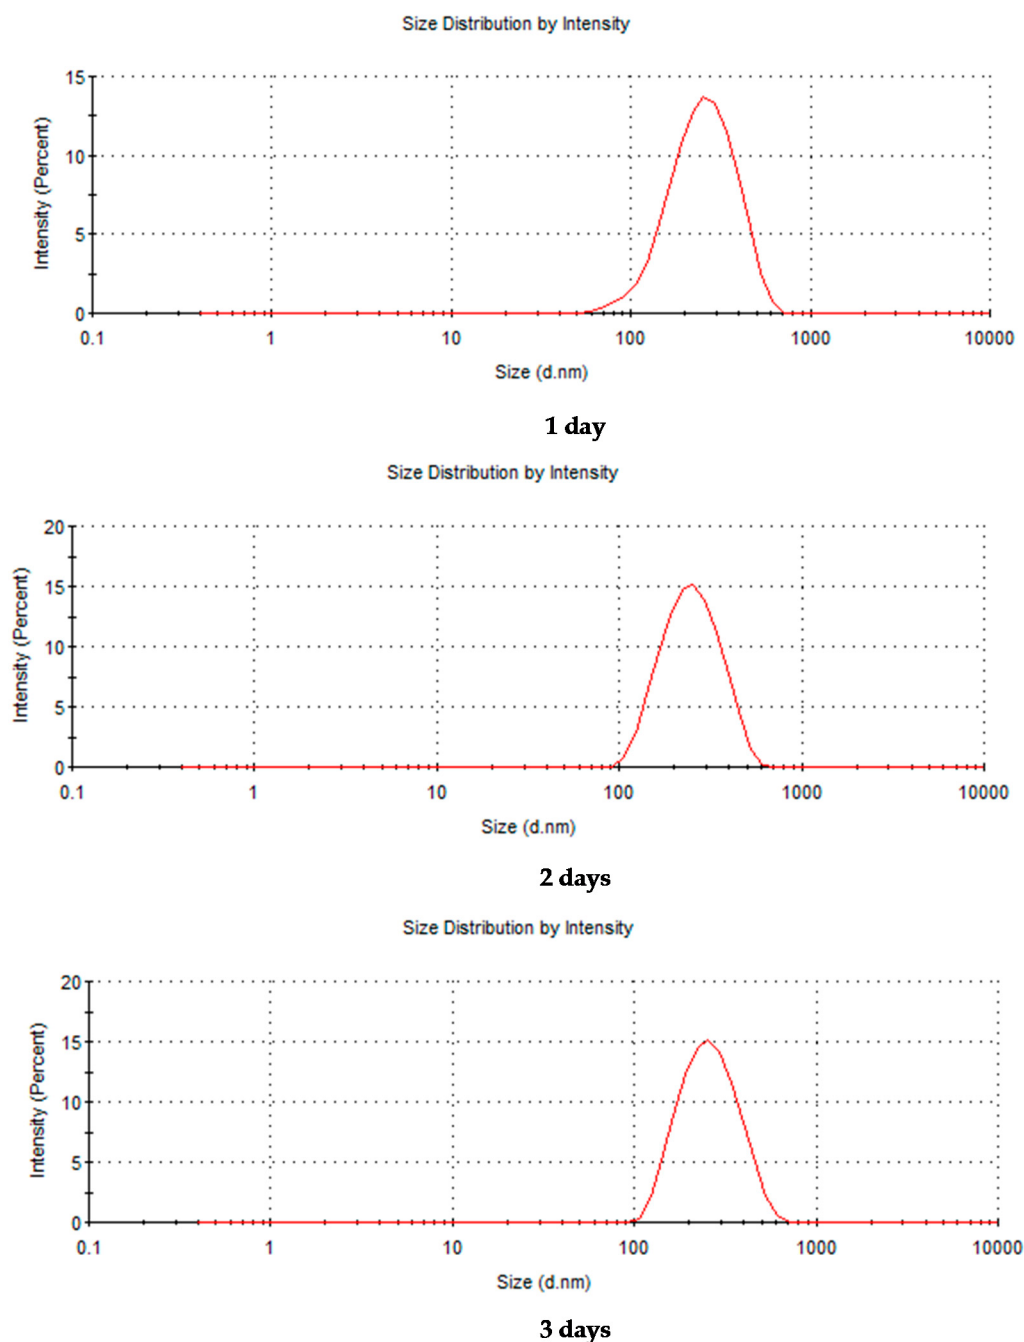

Figure S1. Cont.

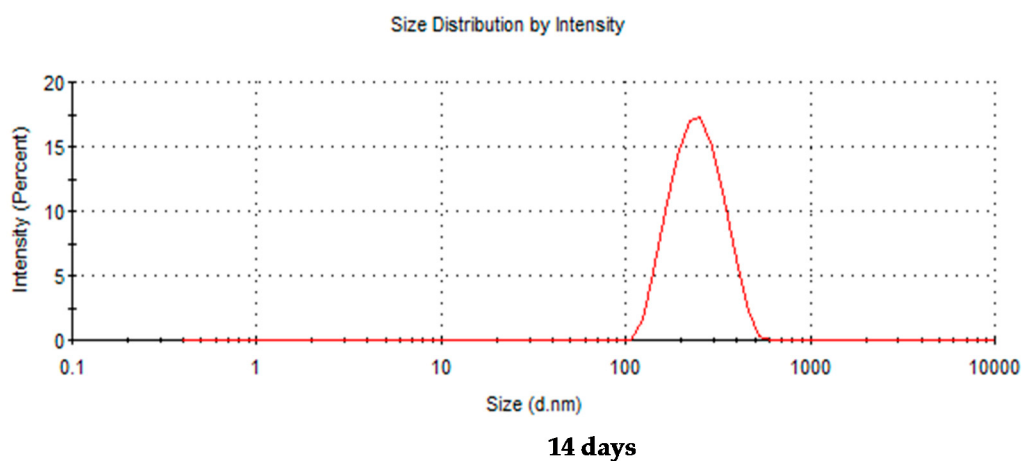

**Figure S1.** The DLS curves illustrating the particle hydrodynamic diameter distribution during the two weeks.

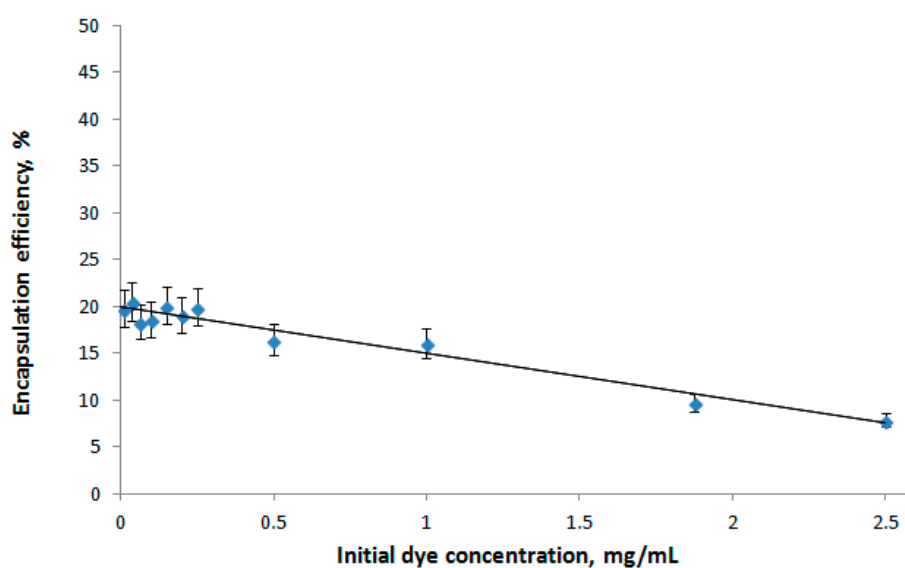

**Figure S2.** The dependence of encapsulation efficiency of bromophenol blue inside pGlu<sub>62-b</sub>-pPhe<sub>82</sub> based particles on initial dye concentration (pH 9.5).

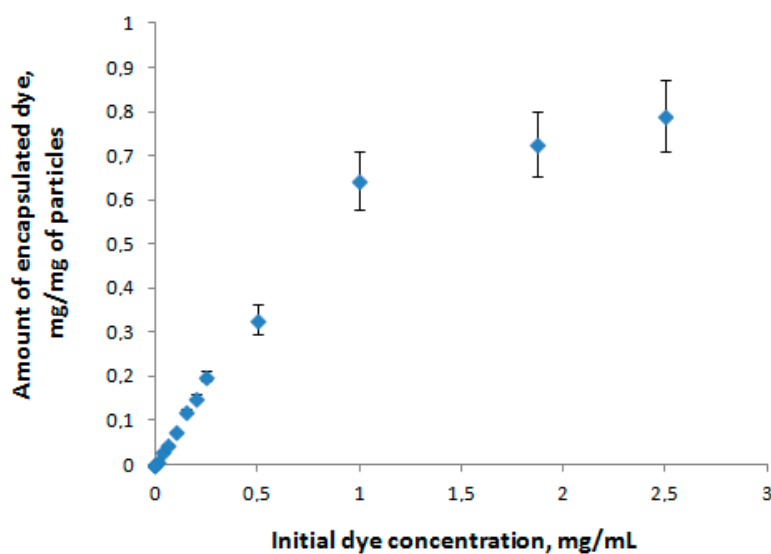

**Figure S3.** The dependence of bromophenol blue amount encapsulated inside pGlu<sub>62-b</sub>-pPhe<sub>82</sub> based particles on initial dye concentration (pH 9.5).

**Table S1.** Kinetic parameters of benzoyl-L-tyrosine ethyl ester (BTEE) hydrolysis catalyzed by  $\alpha$ -chymotrypsin (free and bound to the pGlu<sub>117</sub>-b-pPhe<sub>81</sub> particles).

| Biocatalyst Form                   | Activity, $\mu\text{mol}\cdot\text{min}^{-1}\cdot\text{mg}^{-1}$ | $K_M$ , mM |
|------------------------------------|------------------------------------------------------------------|------------|
| Free $\alpha$ -chymotrypsin        | 11.6                                                             | 3.5        |
| Immobilized $\alpha$ -chymotrypsin | 19.6                                                             | 9.5        |

The determination of enzyme activity was carried out as described in [40].

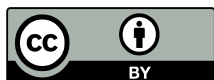

© 2016 by the authors; licensee MDPI, Basel, Switzerland. This article is an open access article distributed under the terms and conditions of the Creative Commons Attribution (CC-BY) license (<http://creativecommons.org/licenses/by/4.0/>).
